# Supplementary material
Source: PubMed Central journal article supplement (PMC3969711)
Supplement: NIHMS566575-supplement-Supporting_Information.pdf [file NIHMS566575-supplement-Supporting_Information.pdf]

# SUPPORTING INFORMATION

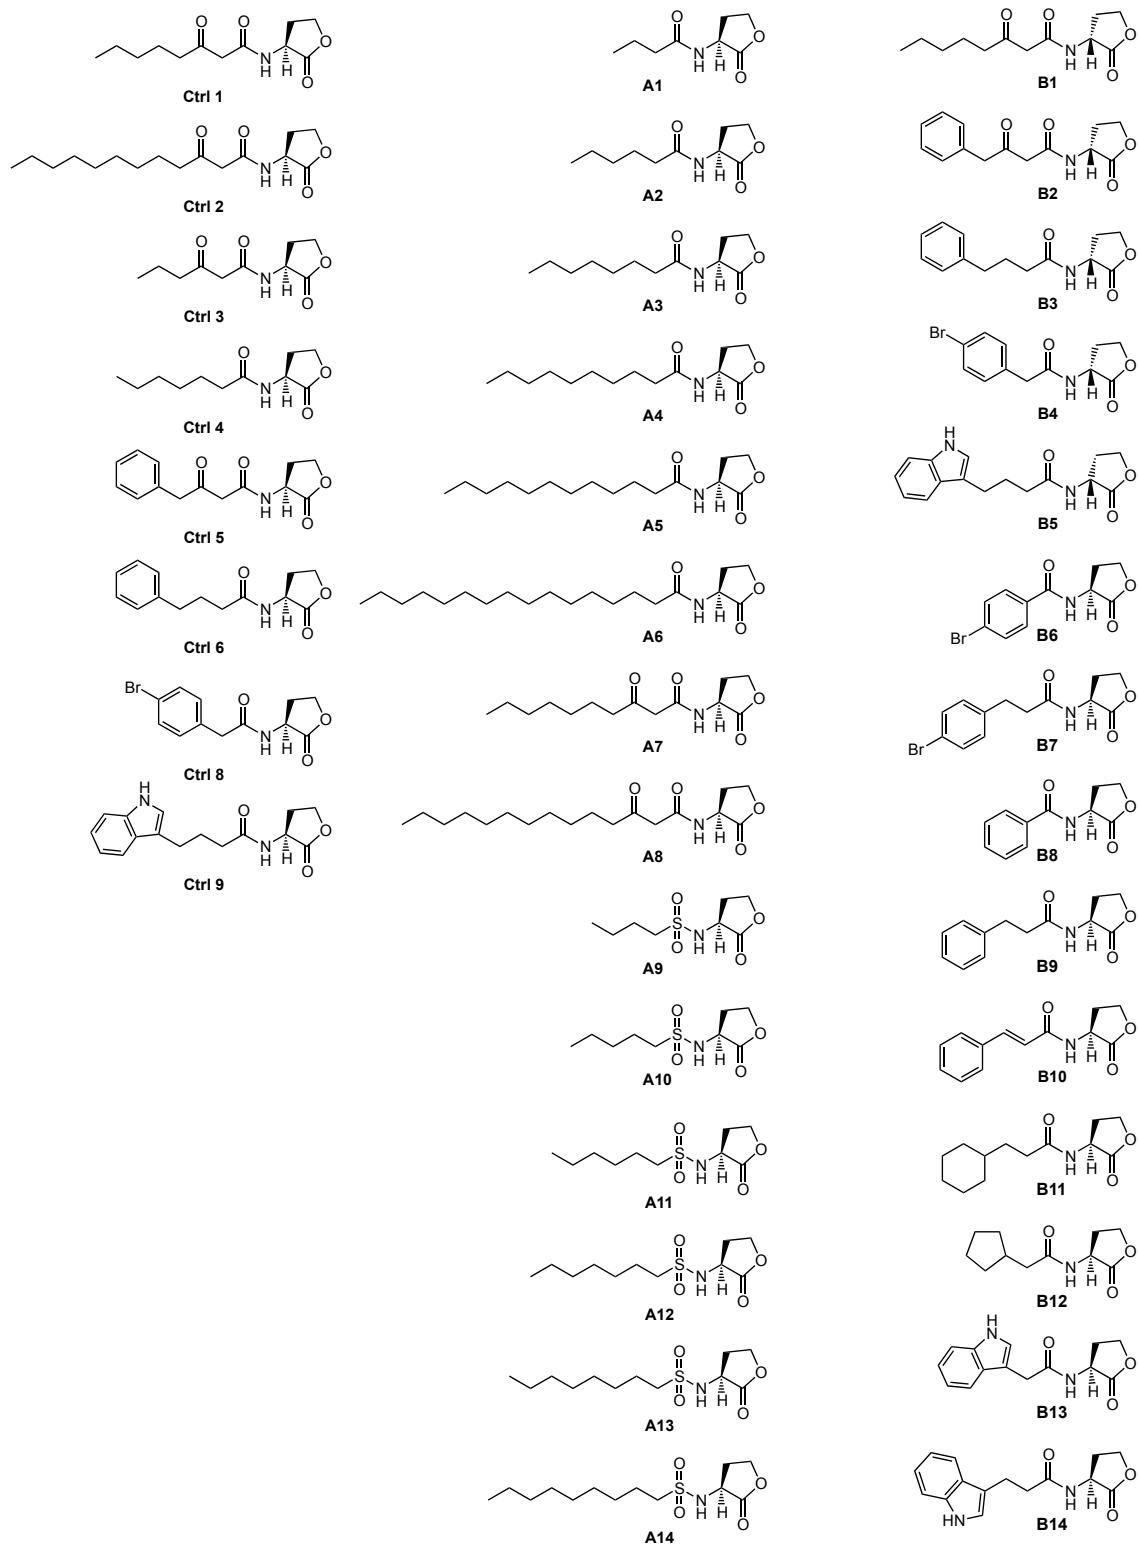

**Figure S1.** AHLs from the control, A, and B libraries examined in this study. Compound numbering is analogous to our earlier publications.<sup>[1]</sup>

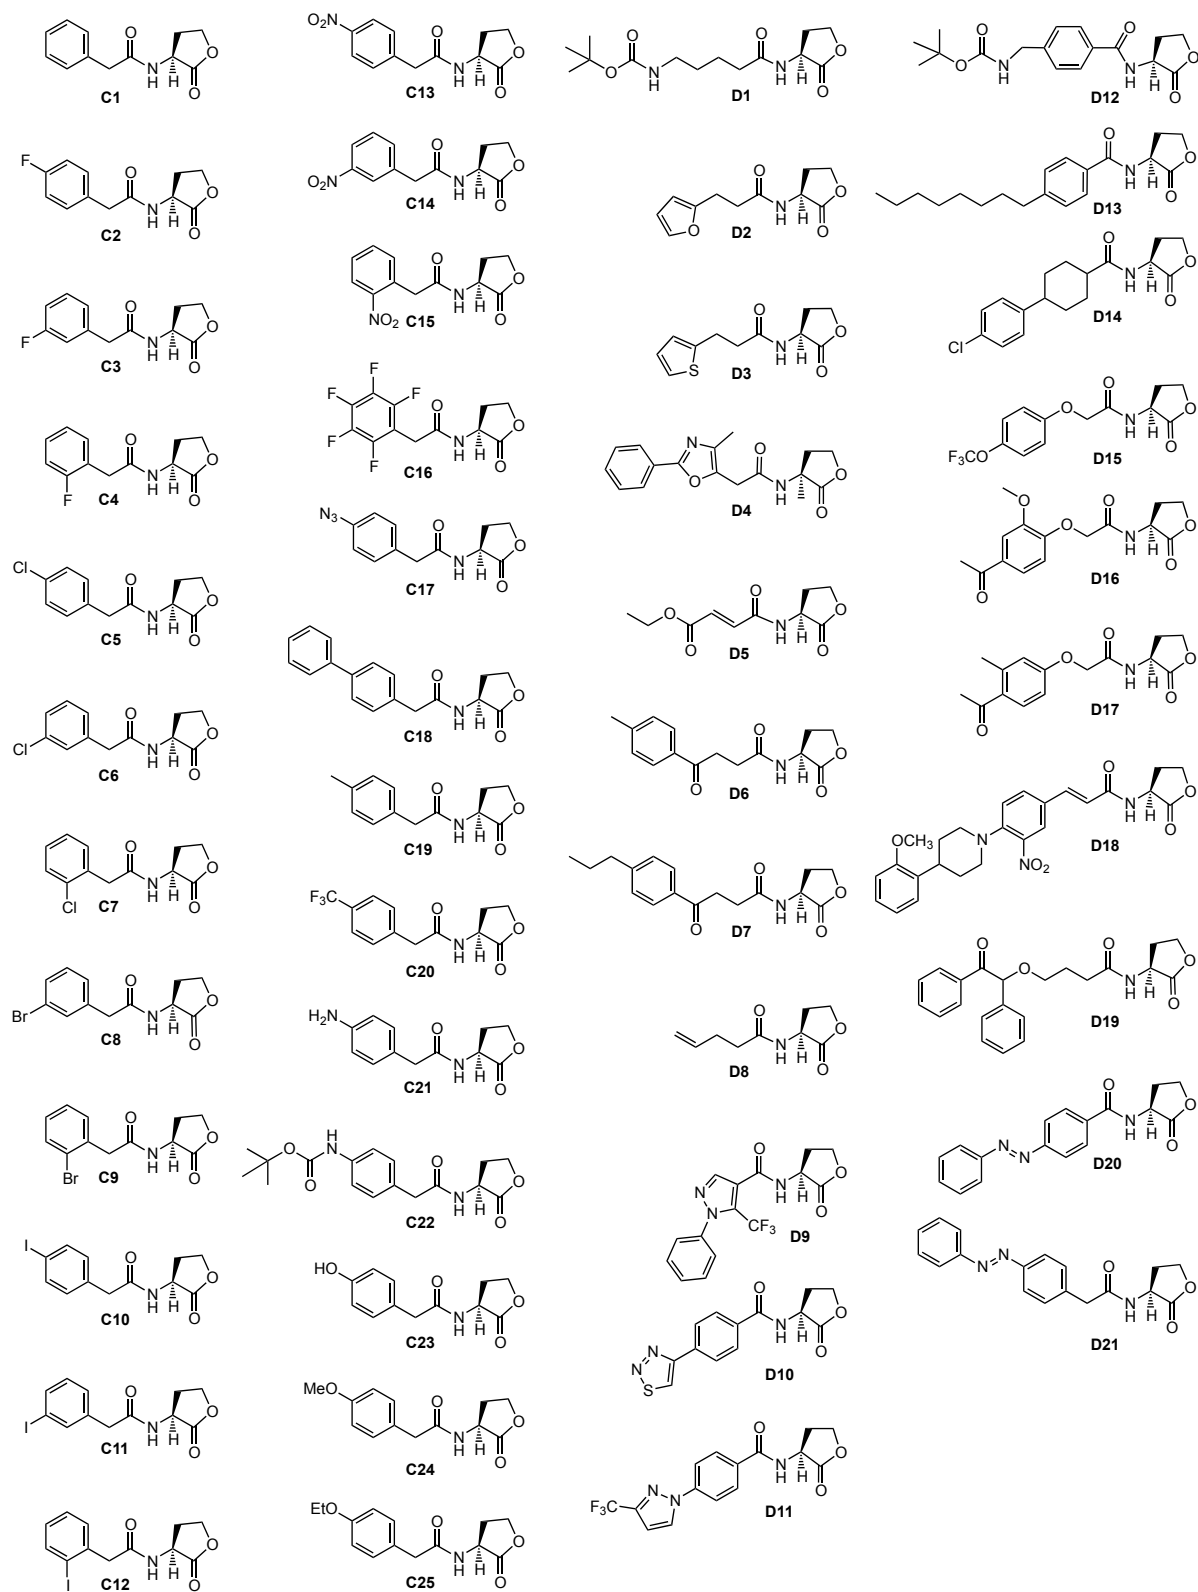

**Figure S2.** AHLs from the C and D libraries examined in this study. Compound numbering is analogous to our earlier publications.<sup>[1]</sup>

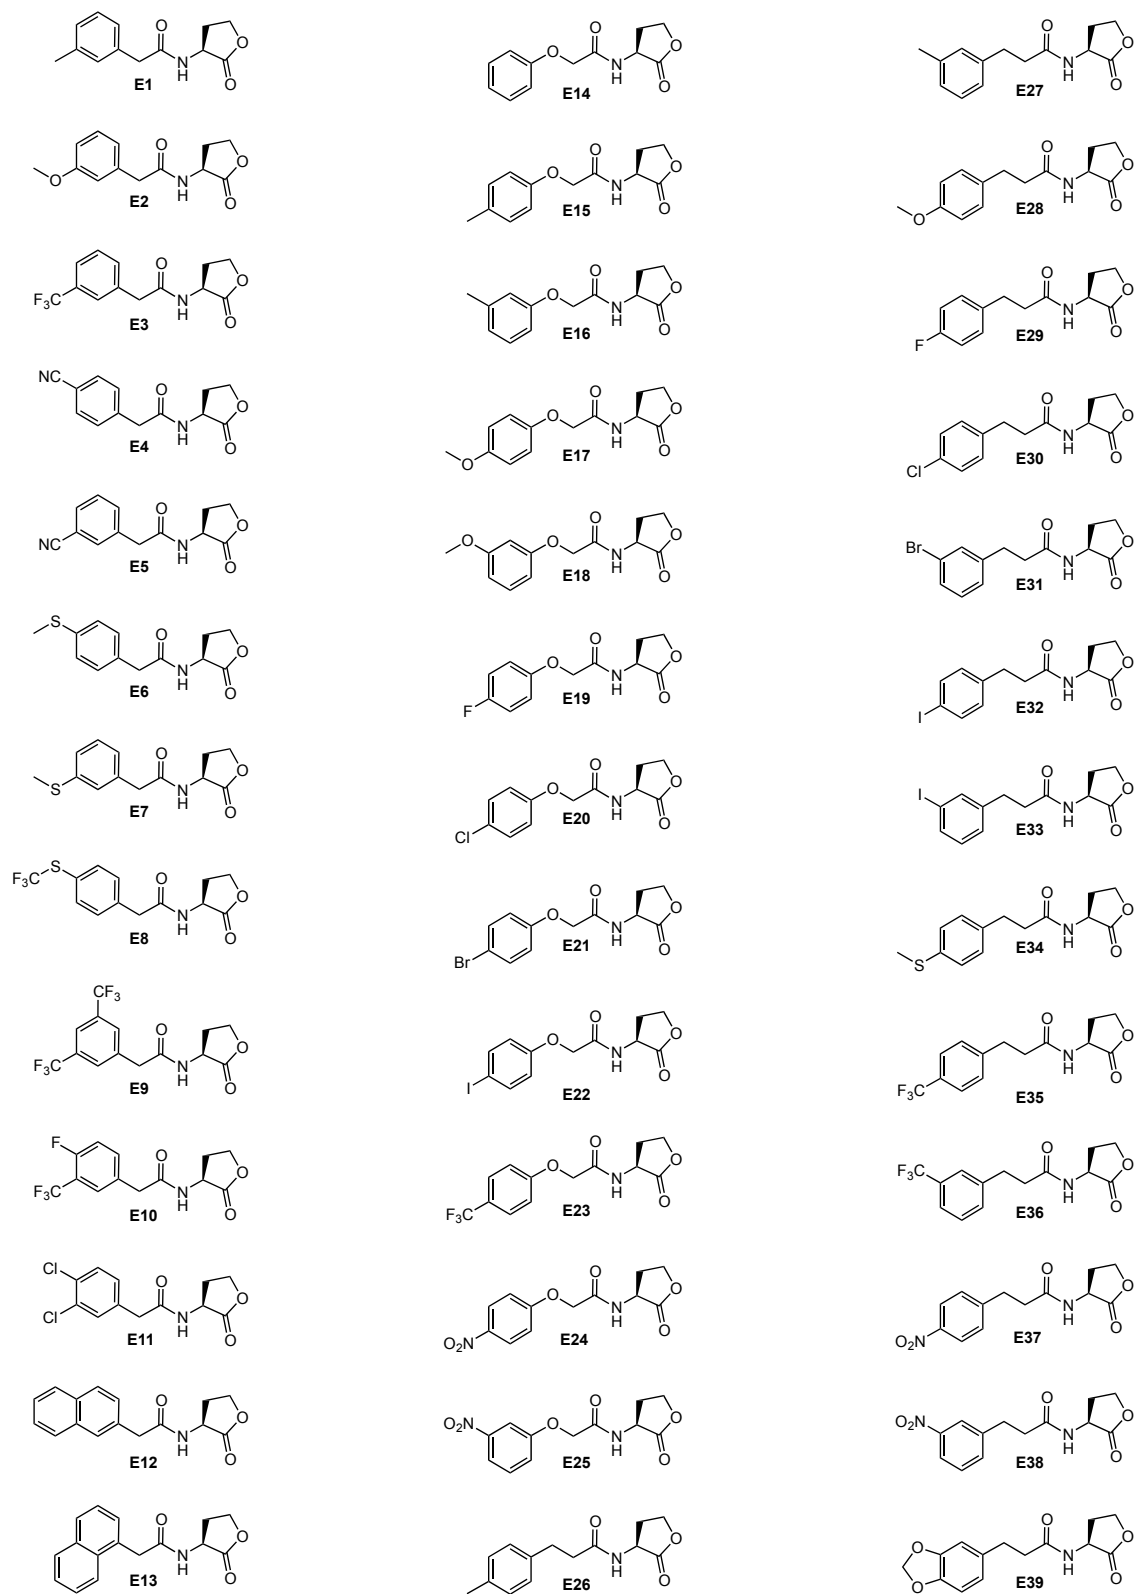

**Figure S3.** AHLs from the E library examined in this study. Compound numbering is analogous to our earlier publications.<sup>[2]</sup>

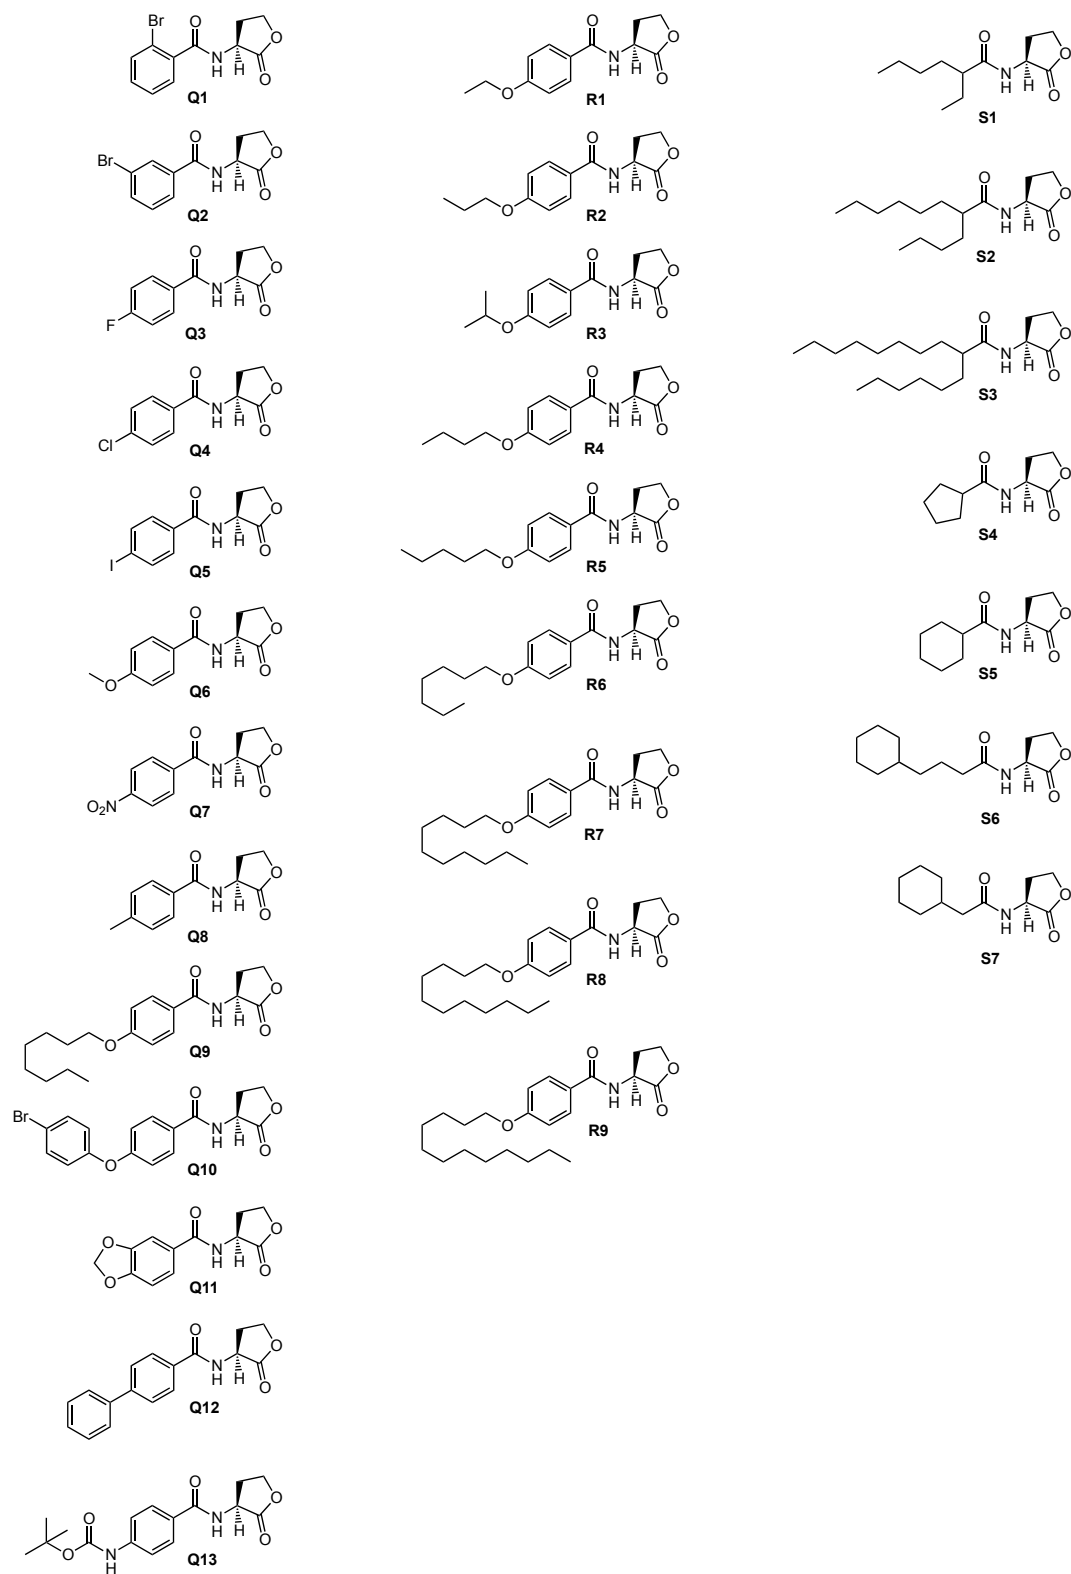

**Figure S4.** AHLs from the Q, R, and S libraries examined in this study. Compound numbering is analogous to our earlier publications.<sup>[3]</sup>

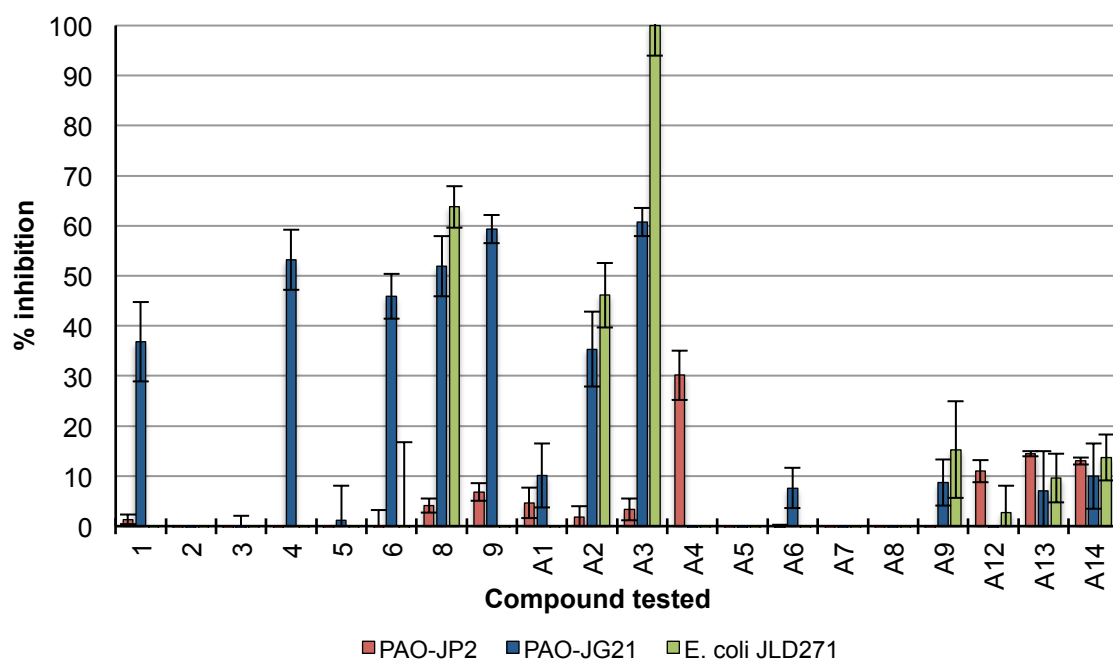

**Figure S5.** Primary LasR antagonism screening data for the control and A libraries in *P. aeruginosa* PAO-JP2 + *plasILVAGFP*, *P. aeruginosa* PAO-JG21 + *plasILVAGFP*, and *E. coli* JLD271 + pPROBE-KL. Antagonism assays were performed using the following compound concentrations and controls:

- PAO-JP2: 10  $\mu$ M of synthetic ligand against 100 nM OdDHL  
 Positive control (100 % inhibition) = 2  $\mu$ L DMSO (no AHL added)  
 Negative control (0 % inhibition) = 100 nM OdDHL
- PAO-JG21: 10  $\mu$ M of synthetic ligand against 10 nM OdDHL  
 Positive control (100 % inhibition) = 2  $\mu$ L DMSO (no AHL added)  
 Negative control (0 % inhibition) = 10 nM OdDHL
- JLD271: 10  $\mu$ M of synthetic ligand against 2 nM OdDHL  
 Positive control (100 % inhibition) = 2  $\mu$ L DMSO (no AHL added)  
 Negative control (0 % inhibition) = 2 nM OdDHL

All fluorescence data were background-corrected by subtracting the negative control fluorescence value (wells containing reporter strain + 2  $\mu$ L DMSO only) from the experimental value. Percent (%) LasR activity was measured by normalizing background-corrected value to fluorescence value obtained in wells containing reporter strain + OdDHL. Percent (%) LasR inhibition = 100% – % LasR activity.

All compounds were screened in triplicate over 3 separate trials. Error bars represent the SEM of 3 trials.

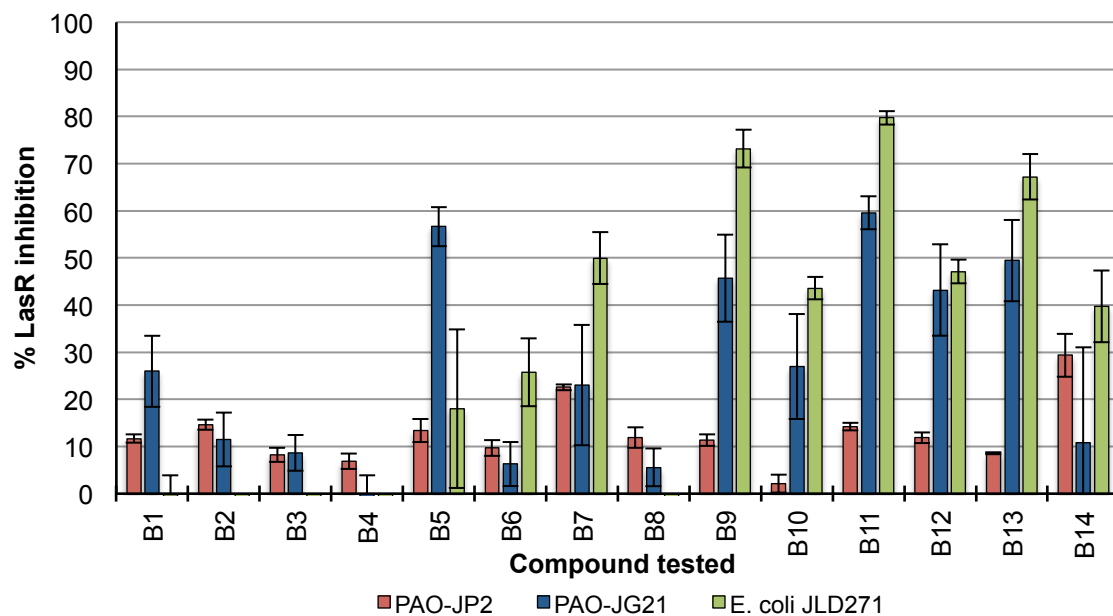

**Figure S6.** Primary LasR antagonism screening data for the B library in *P. aeruginosa* PAO-JP2 + *plasILVAGFP*, *P. aeruginosa* PAO-JG21 + *plasILVAGFP*, and *E. coli* JLD271 + pPROBE-KL. Antagonism assays were performed as described in Figure S5.

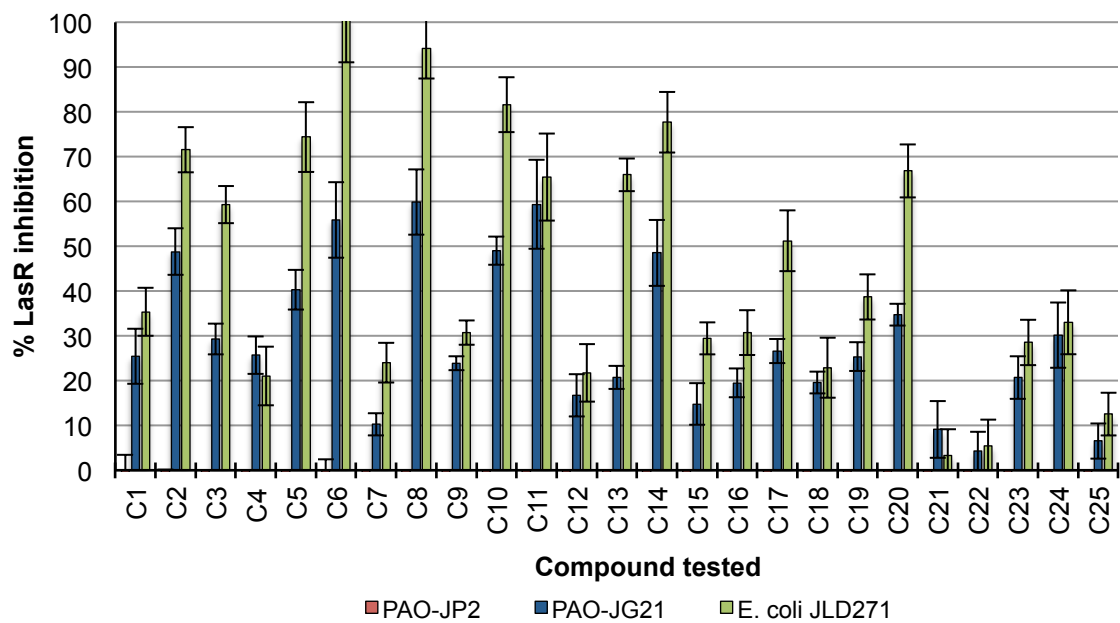

**Figure S7.** Primary LasR antagonism screening data for the C library in *P. aeruginosa* PAO-JP2 + *plasILVAGFP*, *P. aeruginosa* PAO-JG21 + *plasILVAGFP*, and *E. coli* JLD271 + pPROBE-KL. Antagonism assays were performed as described in Figure S5.

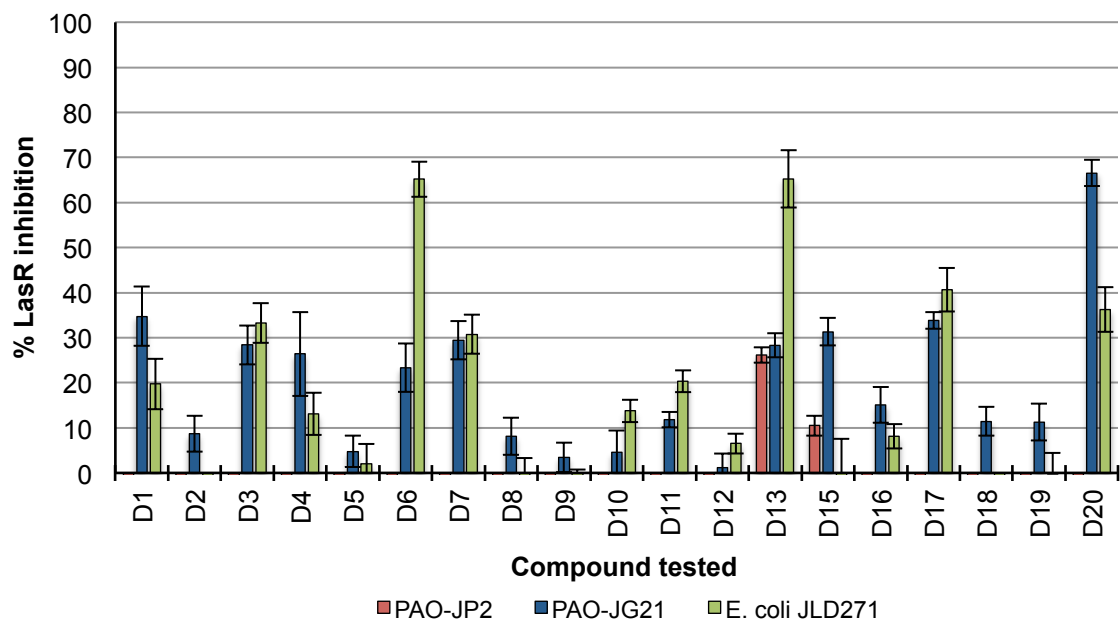

**Figure S8.** Primary LasR antagonism screening data for the D library in *P. aeruginosa* PAO-JP2 + *plasILVAGFP*, *P. aeruginosa* PAO-JG21 + *plasILVAGFP*, and *E. coli* JLD271 + pPROBE-KL. Antagonism assays were performed as described in Figure S5.



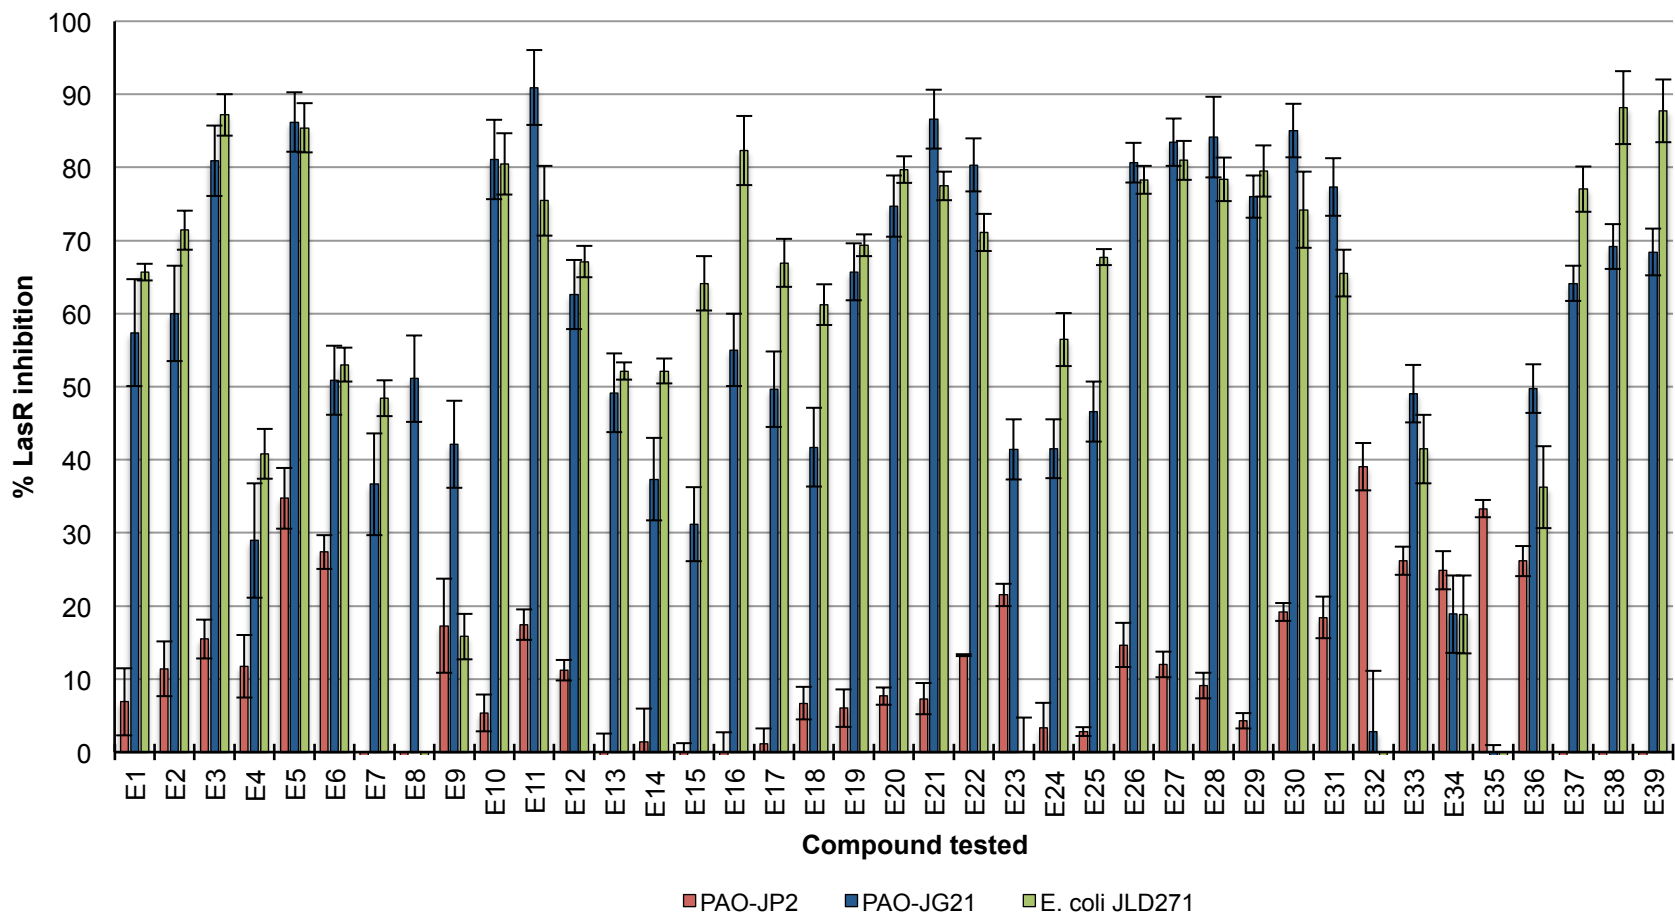

**Figure S9.** Primary LasR antagonism screening data for the E library in *P. aeruginosa* PAO-JP2 + *plasILVAGFP*, *P. aeruginosa* PAO-JG21 + *plasILVAGFP*, and *E. coli* JLD271 + pPROBE-KL. Antagonism assays were performed as described in Figure S5.

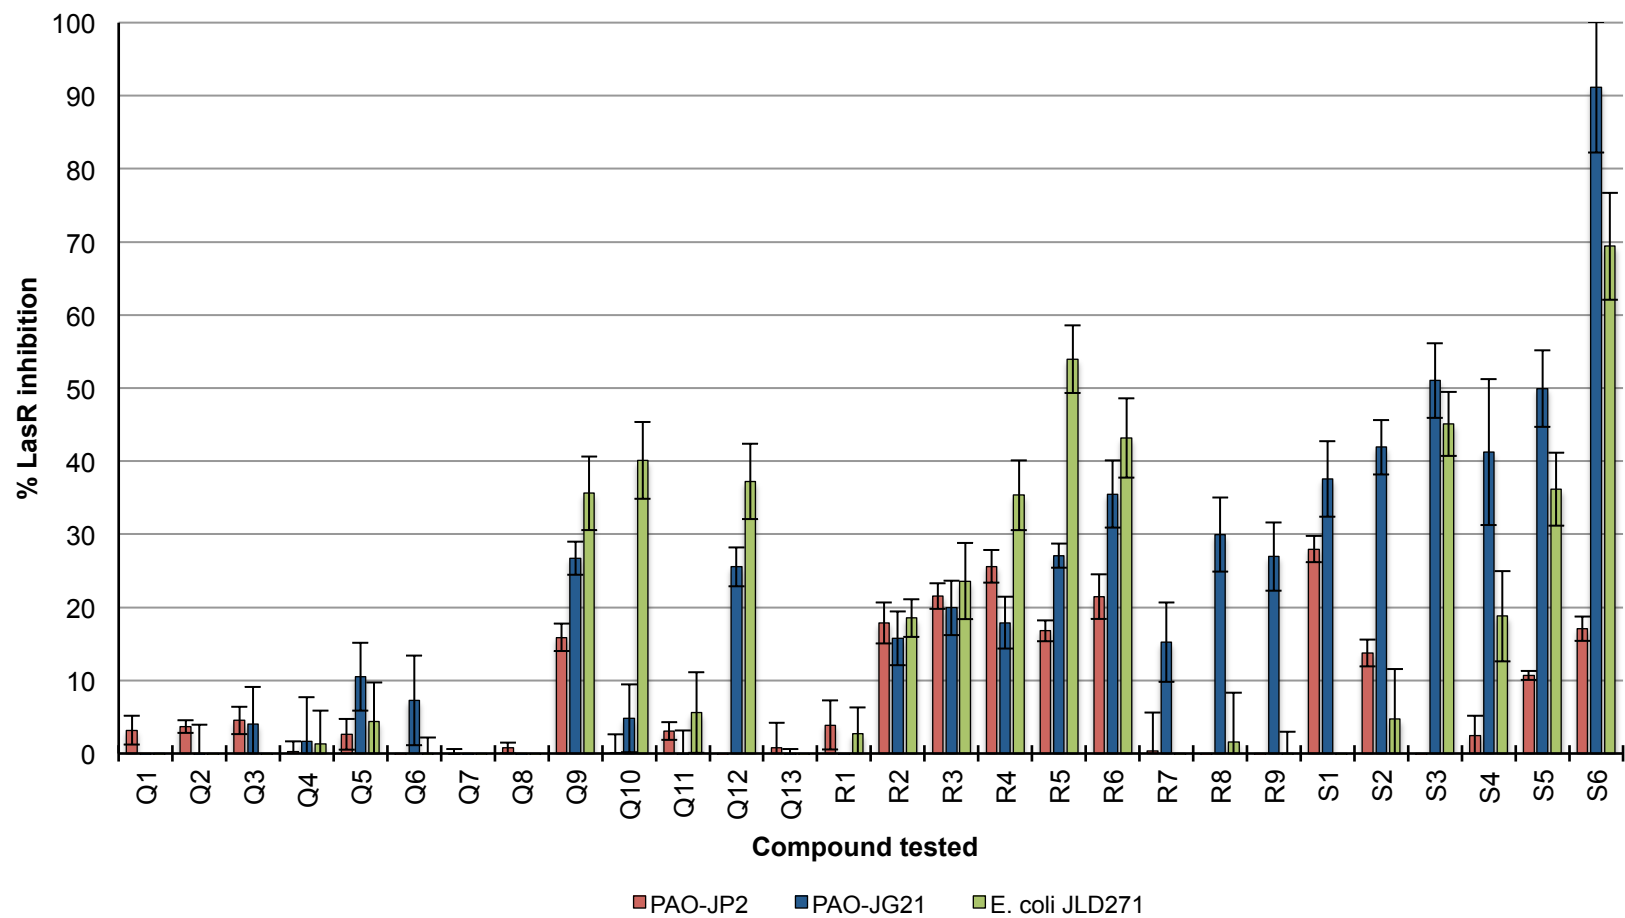

**Figure S10.** Primary LasR antagonism screening data for the Q, R, and S libraries in *P. aeruginosa* PAO-JP2 + *plasILVAGFP*, *P. aeruginosa* PAO-JG21 + *plasILVAGFP*, and *E. coli* JLD271 + pPROBE-KL. Antagonism assays were performed as described in Figure S5.

**Table S1.** List of the most active AHL-derived LasR antagonists identified in the *P. aeruginosa* PAO-JP2 (pump-active) GFP reporter screen and accompanying inhibition data. Primary data from plots in Figures S5–S10.

|                  | Compound   | LasR inhibition (%) |
|------------------|------------|---------------------|
|                  | <b>A4</b>  | 30                  |
|                  | <b>B14</b> | 29                  |
|                  | <b>D13</b> | 26 <sup>a</sup>     |
|                  | <b>E5</b>  | 35                  |
| ≥ 25% inhibition | <b>E6</b>  | 27                  |
|                  | <b>E32</b> | 39                  |
|                  | <b>E33</b> | 26                  |
|                  | <b>E35</b> | 33                  |
|                  | <b>E36</b> | 26                  |
|                  | <b>R4</b>  | 25                  |
|                  | <b>S1</b>  | 28                  |

<sup>a</sup> Compound displayed limited solubility at concentrations greater than 1  $\mu$ M.

**Table S2.** List of the most active AHL-derived LasR antagonists identified in the *P. aeruginosa* PAO-JG21 (pump-mutant) GFP reporter screen and accompanying inhibition data. Primary data from plots in Figures S5–S10.

|                  | Compound   | LasR inhibition (%) |
|------------------|------------|---------------------|
| ≥ 80% inhibition | <b>E3</b>  | 81                  |
|                  | <b>E5</b>  | 86                  |
|                  | <b>E10</b> | 81                  |
|                  | <b>E11</b> | 91                  |
|                  | <b>E21</b> | 87                  |
|                  | <b>E22</b> | 80                  |
|                  | <b>E26</b> | 81                  |
|                  | <b>E27</b> | 83                  |
|                  | <b>E28</b> | 84                  |
|                  | <b>E30</b> | 85                  |
|                  | <b>S6</b>  | 91                  |

|                  | Compound      | LasR inhibition (%) | Compound   | LasR inhibition (%) | Compound   | LasR inhibition (%) |
|------------------|---------------|---------------------|------------|---------------------|------------|---------------------|
| ≥ 25% inhibition | <b>Ctrl 1</b> | 37                  | <b>D1</b>  | 35                  | <b>E21</b> | 87                  |
|                  | <b>Ctrl 4</b> | 53                  | <b>D3</b>  | 28                  | <b>E22</b> | 80                  |
|                  | <b>Ctrl 6</b> | 46                  | <b>D4</b>  | 26                  | <b>E23</b> | 41                  |
|                  | <b>Ctrl 8</b> | 52                  | <b>D7</b>  | 29                  | <b>E24</b> | 42                  |
|                  | <b>Ctrl 9</b> | 59                  | <b>D13</b> | 28 <sup>a</sup>     | <b>E25</b> | 47                  |
|                  | <b>A2</b>     | 35                  | <b>D15</b> | 31                  | <b>E26</b> | 81                  |
|                  | <b>A3</b>     | 61                  | <b>D17</b> | 34                  | <b>E27</b> | 83                  |
|                  | <b>B1</b>     | 26                  | <b>D20</b> | 67                  | <b>E28</b> | 84                  |
|                  | <b>B5</b>     | 57                  | <b>E1</b>  | 57                  | <b>E29</b> | 76                  |
|                  | <b>B9</b>     | 46                  | <b>E2</b>  | 60                  | <b>E30</b> | 85                  |
|                  | <b>B10</b>    | 27                  | <b>E3</b>  | 81                  | <b>E31</b> | 77                  |
|                  | <b>B11</b>    | 60                  | <b>E4</b>  | 29                  | <b>E33</b> | 49                  |
|                  | <b>B12</b>    | 43                  | <b>E5</b>  | 86                  | <b>E36</b> | 50                  |
|                  | <b>B13</b>    | 49                  | <b>E6</b>  | 51                  | <b>E37</b> | 64                  |
|                  | <b>C1</b>     | 25                  | <b>E7</b>  | 37                  | <b>E38</b> | 69                  |
|                  | <b>C2</b>     | 49                  | <b>E8</b>  | 51                  | <b>E39</b> | 68                  |
|                  | <b>C3</b>     | 29                  | <b>E9</b>  | 42                  | <b>Q9</b>  | 27                  |
|                  | <b>C4</b>     | 26                  | <b>E10</b> | 81                  | <b>Q12</b> | 26                  |
|                  | <b>C5</b>     | 40                  | <b>E11</b> | 91                  | <b>R5</b>  | 27                  |
|                  | <b>C6</b>     | 56                  | <b>E12</b> | 63                  | <b>R6</b>  | 35                  |
|                  | <b>C8</b>     | 60                  | <b>E13</b> | 49                  | <b>R8</b>  | 30                  |
|                  | <b>C10</b>    | 49                  | <b>E14</b> | 37                  | <b>R9</b>  | 27                  |
|                  | <b>C11</b>    | 59                  | <b>E15</b> | 31                  | <b>S1</b>  | 38                  |
|                  | <b>C14</b>    | 30                  | <b>E16</b> | 55                  | <b>S2</b>  | 42                  |
|                  | <b>C17</b>    | 35                  | <b>E17</b> | 50                  | <b>S3</b>  | 51                  |
|                  | <b>C19</b>    | 25                  | <b>E18</b> | 42                  | <b>S4</b>  | 41                  |
|                  | <b>C20</b>    | 35                  | <b>E19</b> | 66                  | <b>S5</b>  | 50                  |
|                  | <b>C24</b>    | 30                  | <b>E20</b> | 75                  | <b>S6</b>  | 91                  |

<sup>a</sup> Compound displayed limited solubility at concentrations greater than 1 μM.

**Table S3.** List of the most active AHL-derived LasR antagonists identified in the *E. coli* JLD271 GFP reporter screen and accompanying inhibition data. Primary data from plots in Figures S5–S10.

|                  | Compound   | LasR inhibition (%) |
|------------------|------------|---------------------|
| ≥ 80% inhibition | <b>A3</b>  | 99                  |
|                  | <b>B11</b> | 80                  |
|                  | <b>C6</b>  | 100                 |
|                  | <b>C8</b>  | 94                  |
|                  | <b>C10</b> | 82                  |
|                  | <b>E3</b>  | 87                  |
|                  | <b>E5</b>  | 85                  |
|                  | <b>E10</b> | 80                  |
|                  | <b>E16</b> | 82                  |
|                  | <b>E20</b> | 80                  |
|                  | <b>E27</b> | 81                  |
|                  | <b>E38</b> | 88                  |
|                  | <b>E39</b> | 88                  |

  

|                  | Compound      | LasR inhibition (%) | Compound   | LasR inhibition (%) | Compound   | LasR inhibition (%) |
|------------------|---------------|---------------------|------------|---------------------|------------|---------------------|
| ≥ 25% inhibition | <b>Ctrl 8</b> | 64                  | <b>C20</b> | 67                  | <b>E20</b> | 80                  |
|                  | <b>A2</b>     | 46                  | <b>C23</b> | 29                  | <b>E21</b> | 77                  |
|                  | <b>A3</b>     | 99                  | <b>C24</b> | 33                  | <b>E22</b> | 71                  |
|                  | <b>B6</b>     | 26                  | <b>D3</b>  | 33                  | <b>E24</b> | 56                  |
|                  | <b>B7</b>     | 50                  | <b>D6</b>  | 65                  | <b>E25</b> | 68                  |
|                  | <b>B9</b>     | 73                  | <b>D7</b>  | 31                  | <b>E26</b> | 78                  |
|                  | <b>B10</b>    | 44                  | <b>D13</b> | 65 <sup>a</sup>     | <b>E27</b> | 81                  |
|                  | <b>B11</b>    | 80                  | <b>D17</b> | 41                  | <b>E28</b> | 78                  |
|                  | <b>B12</b>    | 47                  | <b>D20</b> | 36                  | <b>E29</b> | 79                  |
|                  | <b>B13</b>    | 67                  | <b>E1</b>  | 66                  | <b>E30</b> | 74                  |
|                  | <b>B14</b>    | 40                  | <b>E2</b>  | 71                  | <b>E31</b> | 66                  |
|                  | <b>C1</b>     | 35                  | <b>E3</b>  | 87                  | <b>E33</b> | 41                  |
|                  | <b>C2</b>     | 72                  | <b>E4</b>  | 41                  | <b>E36</b> | 36                  |
|                  | <b>C3</b>     | 59                  | <b>E5</b>  | 85                  | <b>E37</b> | 77                  |
|                  | <b>C5</b>     | 74                  | <b>E6</b>  | 53                  | <b>E38</b> | 88                  |
|                  | <b>C6</b>     | 100                 | <b>E7</b>  | 48                  | <b>E39</b> | 88                  |
|                  | <b>C8</b>     | 94                  | <b>E10</b> | 80                  | <b>Q9</b>  | 36                  |
|                  | <b>C9</b>     | 31                  | <b>E11</b> | 75                  | <b>Q10</b> | 40                  |
|                  | <b>C10</b>    | 82                  | <b>E12</b> | 67                  | <b>Q12</b> | 37                  |
|                  | <b>C11</b>    | 65                  | <b>E13</b> | 52                  | <b>R4</b>  | 35                  |
|                  | <b>C13</b>    | 66                  | <b>E14</b> | 52                  | <b>R5</b>  | 54                  |
|                  | <b>C14</b>    | 78                  | <b>E15</b> | 64                  | <b>R6</b>  | 43                  |
|                  | <b>C15</b>    | 29                  | <b>E16</b> | 82                  | <b>S3</b>  | 45                  |
|                  | <b>C16</b>    | 31                  | <b>E17</b> | 67                  | <b>S5</b>  | 36                  |
|                  | <b>C17</b>    | 51                  | <b>E18</b> | 61                  | <b>S6</b>  | 69                  |
|                  | <b>C19</b>    | 39                  | <b>E19</b> | 69                  |            |                     |

<sup>a</sup> Compound displayed limited solubility at concentrations greater than 1 μM.

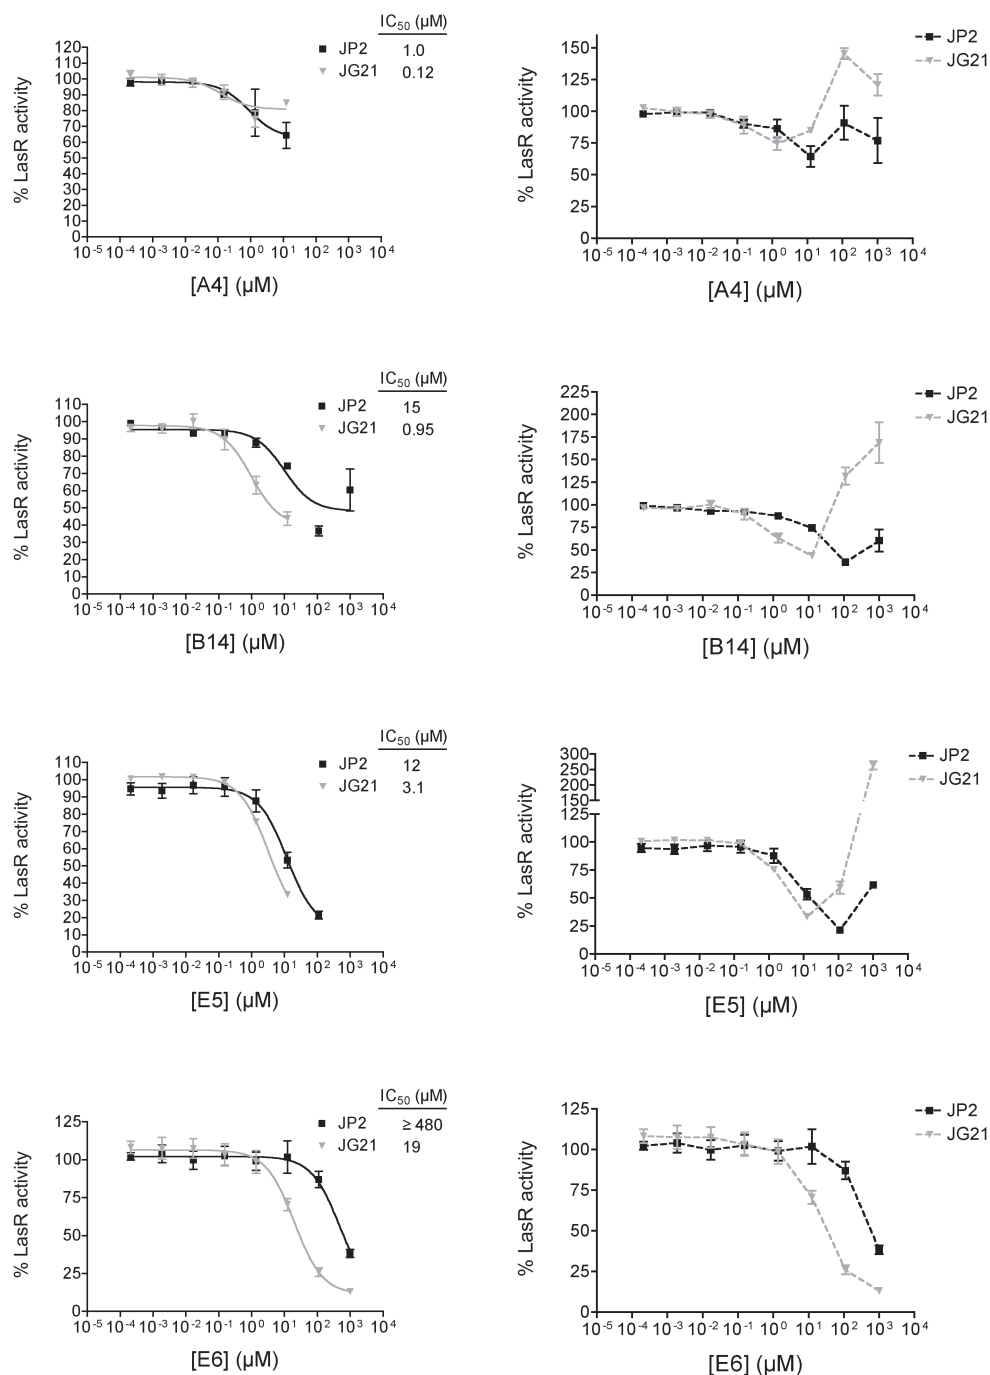

**Figure S11.** LasR antagonism dose responses and  $\text{IC}_{50}$  values for AHLs A4, B14, E5, and E6 in *P. aeruginosa* PAO-JP2 and PAO-JG21. Plots on the left are truncated to show the dose response curves of the compounds in the inhibitory concentration range for each strain. Plots on the right show the full dose response including non-monotonic behavior, if applicable. Synthetic compounds were screened against 100 nM and 10 nM OdDHL in PAO-JP2 and PAO-JG21, respectively, over varying concentrations.  $\text{IC}_{50}$  values were calculated from the truncated plots using GraphPad Prism. Error bars, SEM of  $n = 3$  trials.

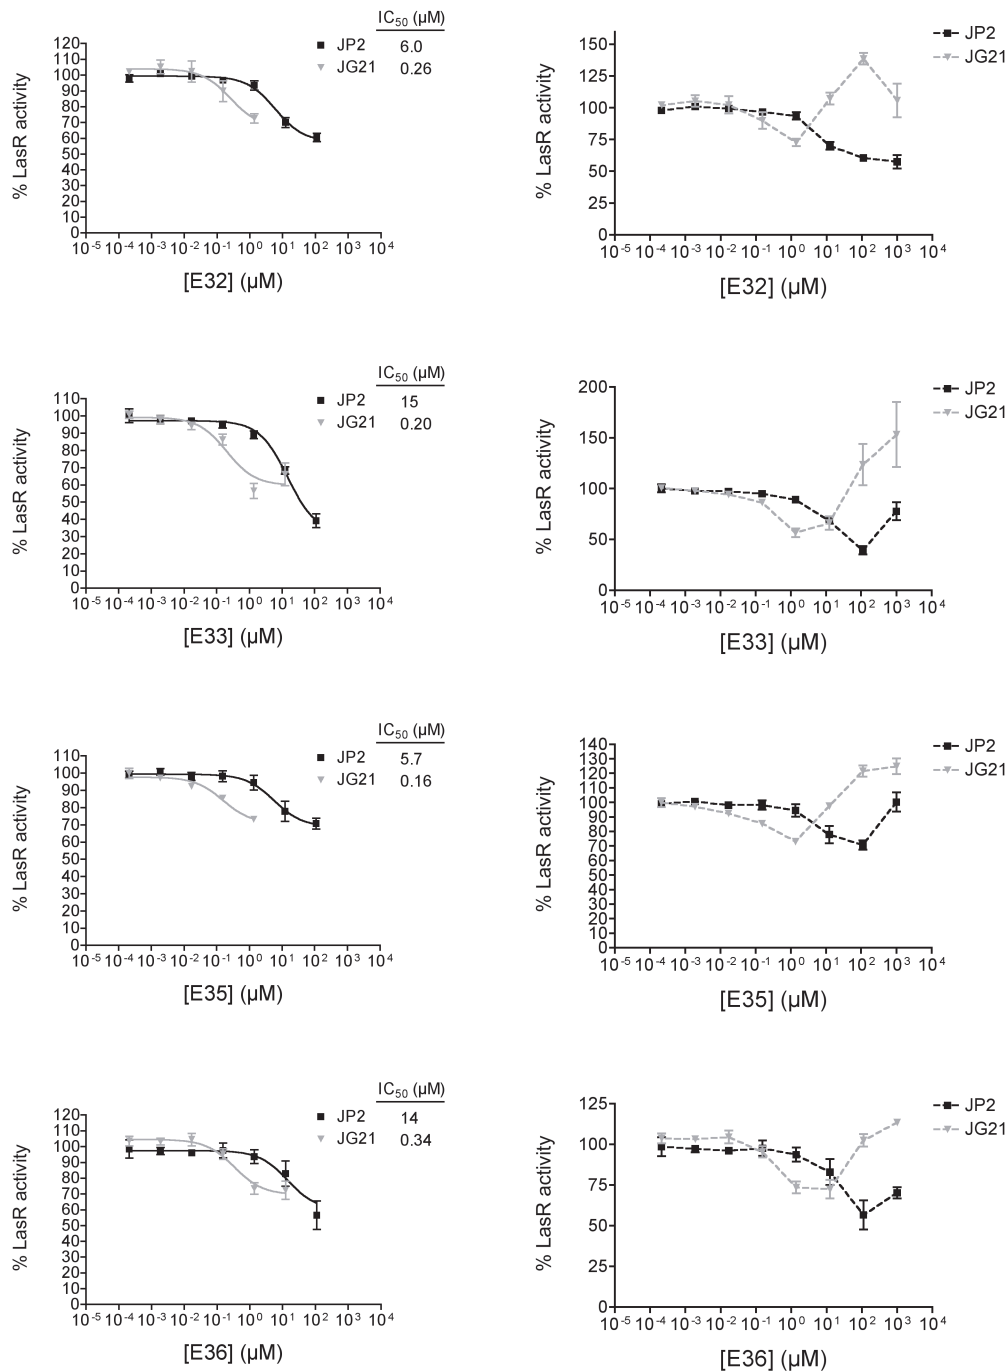

**Figure S12.** LasR antagonism dose responses and IC<sub>50</sub> values for AHLs E32, E33, E35, and E36 in *P. aeruginosa* PAO-JP2 and PAO-JG21. Plots on the left are truncated to show the dose response curves of the compounds in the inhibitory concentration range for each strain. Plots on the right show the full dose response including non-monotonic behavior, if applicable. Synthetic compounds were screened against 100 nM and 10 nM OdDHL in PAO-JP2 and PAO-JG21, respectively, over varying concentrations. IC<sub>50</sub> values were calculated from the truncated plots using GraphPad Prism. Error bars, SEM of n = 3 trials.

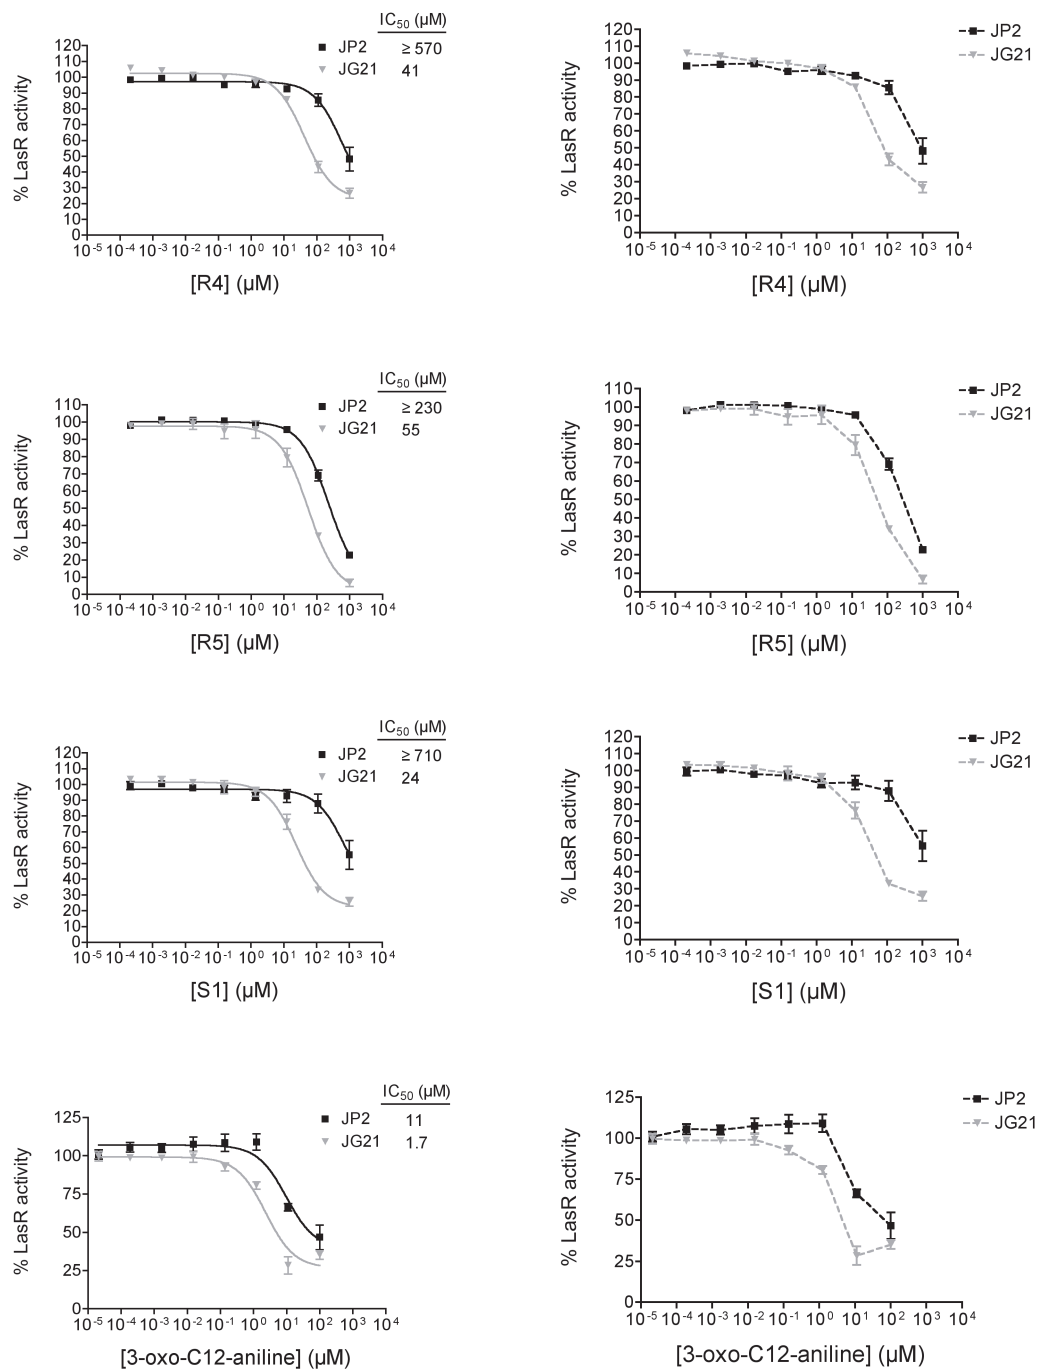

**Figure S13.** LasR antagonism dose responses and  $IC_{50}$  values for AHLs **R4**, **R5**, **S1**, and 3-oxo-C12-aniline in *P. aeruginosa* PAO-JP2 and PAO-JG21. Plots on the left are truncated to show the dose response curves of the compounds in the inhibitory concentration range for each strain. Plots on the right show the full dose response including non-monotonic behavior, if applicable. Synthetic ligands screened against 100 nM and 10 nM OdDHL in PAO-JP2 and PAO-JG21, respectively, over varying concentrations of inhibitor.  $IC_{50}$  values were calculated from the truncated plots using GraphPad Prism. Error bars, SEM of  $n = 3$  trials.



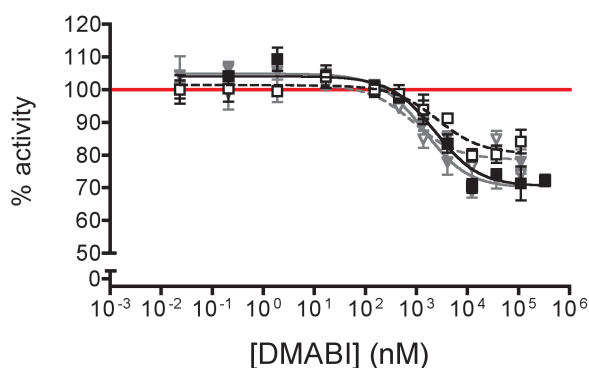

| Trial                      | IC <sub>50</sub> (μM) |
|----------------------------|-----------------------|
| ■ PAO-JP2                  | 2.3                   |
| □ PAO-JP2 + 25 μg/mL PAβN  | 2.9                   |
| ▼ PAO-JG21                 | 1.4                   |
| ▽ PAO-JG21 + 25 μg/mL PAβN | 0.89                  |

**Figure S14.** LasR antagonism dose response curves for DMABI in *P. aeruginosa* PAO-JP2 and PAO-JG21 in the absence and presence of PAβN. DMABI potency was not affected by removal of MexAB-OprM or addition of the RND pump inhibitor PAβN. Antagonism assays were performed using the following compound concentrations and controls:

PAO-JP2:

Variable concentrations of DMABI against 100 nM OdDHL

Positive control (100 % inhibition) = 2 μL DMSO (no AHL added)

Negative control (0 % inhibition; red line) = 100 nM OdDHL

PAO-JG21; PAO-JP2 + PAβN; PAO-JG21 + PAβN:

Variable concentrations of DMABI against 10 nM OdDHL

Positive control (100 % inhibition) = 2 μL DMSO (no AHL added)

Negative control (0 % inhibition; red line) = 10 nM OdDHL

All fluorescence data were background-corrected by subtracting the negative control fluorescence value (wells containing reporter strain + 2 μL DMSO only) from the experimental value. Percent (%) LasR activity was measured by normalizing the background-corrected value to the fluorescence value obtained in wells containing reporter strain + OdDHL. Percent (%) LasR inhibition = 100% – % LasR activity.

IC<sub>50</sub> values were calculated using GraphPad Prism. Error bars, SEM of n = 3 trials.

The % activity scale on the y-axis has been zoomed to show that LasR inhibition by DMABI, while modest, is significant relative to the negative control.

## **References.**

- [1] G. D. Geske, J. C. O'Neill, D. M. Miller, M. E. Mattmann, H. E. Blackwell, *J. Am. Chem. Soc.* **2007**, *129*, 13613-13625.
- [2] G. D. Geske, M. E. Mattmann, H. E. Blackwell, *Bioorg. Med. Chem. Lett.* **2008**, *18*, 5978-5981.
- [3] M. E. Mattmann, P. M. Shipway, N. J. Heth, H. E. Blackwell, *ChemBioChem* **2011**, *12*, 942-949.
